# Supplementary material
Source: PubMed Central journal article supplement (PMC3864412)
Supplement: 10-1055-s-0032-1328435-sup_de_gf612.pdf [file 10-1055-s-0032-1328435-sup_de_gf612.pdf]

# Neonatale Verlegungsrate und Entbindungsmodus ab der 37. Schwangerschaftswoche in einem deutschen Perinatalzentrum Level 1

## Neonatal Transfer Rate and Mode of Delivery from 37th Week of Gestation in a German Perinatal Center Level 1

### Autoren

J. Reinhard<sup>1</sup>, L. Hanker<sup>2</sup>, N. Sanger<sup>2</sup>, J. Yuan<sup>2</sup>, F. Louwen<sup>2</sup>

### Institute

<sup>1</sup> St. Marienkrankenhaus Frankfurt, Frankfurt am Main

<sup>2</sup> Johann Wolfgang Goethe-Universitat Frankfurt am Main, Klinik fur Frauenheilkunde und Geburtshilfe, Frankfurt am Main

### Schlusselwort(er)

- ◉ Entbindungsmodus (Sectio, Forzeps, Spontanpartus)
- ◉ vaginale Beckenendlagen-Entbindung
- ◉ Gemini
- ◉ reife Neugeborene
- ◉ Verlegungsrate

### Key words

- ◉ mode of delivery (caesarean section, forceps, vaginal delivery)
- ◉ vaginal breech delivery
- ◉ twin
- ◉ term neonate
- ◉ transfer rate to neonatal intensive care

eingereicht 28.6.2012

revidiert 5.2.2013

akzeptiert 6.3.2013

### Bibliografie

**DOI** <http://dx.doi.org/10.1055/s-0032-1328435>  
Geburtsh Frauenheilk 2013; 73: 1–6 © Georg Thieme Verlag KG Stuttgart · New York · ISSN 0016-5751

### Korrespondenzadresse

**Priv. Doz. Dr. med. Joscha Reinhard, MBBS BSc (Hon)**  
St. Marienkrankenhaus Frankfurt  
Richard-Wagner Strae 14  
60318 Frankfurt am Main  
J.Reinhard@katharina-kasper.de

### Zusammenfassung

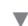

**Einleitung:** Die steigende Sectio-Rate wird weltweit diskutiert. Aufgrund der unklaren Datenlage scheint die Identifikation weiterer pradiktiver Faktoren, um die Indikation fur eine Sectio zu stellen, sinnvoll und notig, da diese eng mit mutterlicher und kindlicher Morbiditat verbunden ist. In dieser Studie wird versucht, die Verlegungsrate auf die neonatologische Intensivstation von Neugeborenen ( $\geq 36 + 0$  SSW) durch den Entbindungsmodus vorherzusagen. Auerdem wird nach Faktoren gesucht, die die Wahrscheinlichkeit einer Verlegung beeinflussen.

**Material und Methode:** Die Daten aller Einlings- ( $n = 4181$ ) und Zwillingsschwangerschaften ( $n = 305$  Neugeborene), die zwischen dem 1. Januar 2009 und dem 31. Marz 2012 in der Universitatsfrauenklinik Frankfurt am Main entbunden wurden, wurden ausgewertet. Die Indikation der Verlegung auf die neonatologische Intensivstation sowie mogliche pradiktive Faktoren wurden evaluiert.

**Ergebnisse:** In unserer Studie zeigte sich bei vaginalen Geburten von Schwangeren ohne Risikofaktoren eine fast 2-fach niedrigere neonatale Verlegungsrate im Vergleich zu Risikoschwangeren. Die folgenden Verlegungsraten wurden bei Einlingschwangerschaften detektiert: 4,7% ohne Risikofaktoren, 8,3% Risikoschwangerschaft, 6,2% vaginale Beckenendlagen-Entbindungen, 9,3% Forzeps-Entbindung, 10,0% primare Sectio und 14,0% sekundare Sectio. Es zeigte sich eine signifikante Korrelation der Schwangerschaftswoche mit der Verlegungsrate in die Kinderklinik ( $Rho\ 0,11; p < 0,001$ ). Auerdem zeigten sich weitere Korrelationen mit dem Entbindungsmodus (0,12;  $p < 0,001$ ), 5-Minuten-Apgar (0,24;  $p < 0,001$ ), 10-Minuten-Apgar (0,34;  $p < 0,001$ ) und Geburtsgewicht (0,12;  $p < 0,001$ ).

**Schlussfolgerung:** Die vaginale Entbindung zeigte eine statistisch signifikant niedrigere Rate an

### Abstract

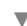

**Introduction:** Rates for caesarean section are on the rise and the reasons for this are being discussed worldwide. As the data is unclear, the identification of additional predictive factors for caesarean section is important as caesarean sections are closely linked to maternal and neonatal morbidity. The aim of the study was to identify predictive factors for the transfer of the neonate to a neonatal intensive care unit (NICU) depending on the mode of delivery. The study investigated the neonatal transfer rates for singleton and twin pregnancies delivered at  $\geq 36 + 0$  weeks of gestation.

**Material and Methods:** The data of all singleton ( $n = 4181$ ) and twin pregnancies ( $n = 305$  neonates), delivered between 1 January 2009 and 31 March 2012 in the OB/Gyn Department of the University Hospital Frankfurt/M, Germany, (perinatal center level 1) were evaluated. The indications for transfer to the NICU and possible predictive factors were evaluated.

**Results:** Our study found a two times lower neonatal transfer rate for vaginal deliveries of pregnant women without risk factors compared to women with risk factors. The following neonatal transfer rates to the NICU were noted for singleton pregnancies: 4.7% without risk factors, 8.3% high-risk pregnancy, 6.2% vaginal breech delivery, 9.3% forceps delivery, 10.0% elective primary caesarean section and 14.0% secondary caesarean section. There was a statistically significant correlation between gestational age and transfer to the NICU ( $\rho\ 0.11; p < 0.001$ ). Similarly, a correlation was also found for mode of delivery (0.12;  $p < 0.001$ ), 5 minute Apgar score (0.24;  $p < 0.001$ ), 10 minute Apgar score (0.34;  $p < 0.001$ ) and birth weight (0.12;  $p < 0.001$ ).

**Conclusion:** Vaginal delivery resulted in a lower rate of neonatal transfers compared to caesarean section and the difference was statistically significant.

neonatalen Verlegungen im Vergleich zur Sectio. Das Schwangerschaftsalter hat einen statistisch signifikanten Einfluss auf die Verlegungsrate.

icant. Gestational age had a statistically significant impact on the transfer rate.

## Einleitung

Die steigende Sectio-Rate wird weltweit diskutiert, wobei viele kausale Faktoren schon identifiziert wurden. Diese Faktoren sind: mütterliche Wahl des Geburtsmodus [1,2], vaginale Geburt bei Zustand nach Sectio [3] und die Beckenendlage (BEL) [4]. In aktuellen Studien wurde ein besonderer Fokus auf die mütterliche und neonatale Morbidität gelegt [1,2,4-7]. Es gibt Empfehlungen für die die elektive Sectio zur Reduktion der „Geburtsangst“ [8] und postpartaler Inkontinenzbeschwerden [9] sowie einer Risikoreduktion bei BEL [4]. Andere Studien kommen zu dem Ergebnis, die vaginale Geburt wegen einer niedrigeren mütterlichen Mortalität [10], kürzerer Rekonvaleszenzzeit [11], einer niedrigeren intrauterinen Fruchttodrate bei Folgeschwangerschaften [3] und selteneren neonatalen Anpassungsstörungen [5,12-16] zu empfehlen.

Aufgrund der unklaren Datenlage scheint die Identifikation weiterer prädiktiver Faktoren, um die Indikation für eine elektive Sectio zu stellen, sinnvoll und nötig, da diese eng mit mütterlicher und kindlicher Morbidität verbunden ist [17].

In dieser Studie wird versucht, die Verlegungsrate auf die neonatologische Intensivstation von Neugeborenen ( $\geq 36+0$  SSW) durch den Entbindungsmodus vorherzusagen. Außerdem wird nach Faktoren gesucht, welche die Wahrscheinlichkeit einer Verlegung beeinflussen.

## Material und Methode

Alle Einlings- ( $n=4181$ ) und Zwillingsgeburten ( $n=305$ )  $\geq 36+0$  Schwangerschaftswochen (SSW) vom 1. Januar 2009 bis zum 31. März 2012 in der Klinik für Frauenheilkunde und Geburtshilfe der Johann Wolfgang Goethe-Universität Frankfurt (Zertifiziertes Perinatalzentrum Level 1) wurden retrospektiv analysiert (Abb. 1). Alle Schwangeren wurden anhand des Geburtsdokumentationssystems GeDoWin Geburt© (Version 13.04) ausgewählt (Einschlusskriterien:  $\geq 36+0$  SSW; Ausschlusskriterien: intrauteriner Fruchttod, Drillinge, Vierlinge). Die Schwangerschaftswoche wurde anhand der letzten Periode bzw. Ultraschall im 1. Trimenon berechnet. Die Entscheidung zur vaginal-operativen Entbindung wurde konform mit der DGGG Leitlinie Vaginal-operative Entbindungen [18] durchgeführt. Als Risikoschwangerschaft wurde die Definition des Mutterpasses angewendet.

Die Verlegungsgründe wurden anhand der Diagnosen des GeDoWin Geburt© evaluiert. Die Verlegungsgründe sind im Qualitätsmanagement der Leitlinien für die medizinische Versorgung von Neugeborenen definiert. Bei folgenden Erkrankungen des Neugeborenen wird der/die zuständige Kinderarzt/ärztin informiert, der/die die notwendigen weiteren diagnostischen Maßnahmen und ggf. die Verlegung in die Kinderklinik veranlasst:

- ▶ beim Auftreten von Atemstörungen (Tachypnoe, Dyspnoe, Zyanose)
- ▶ Ikterus

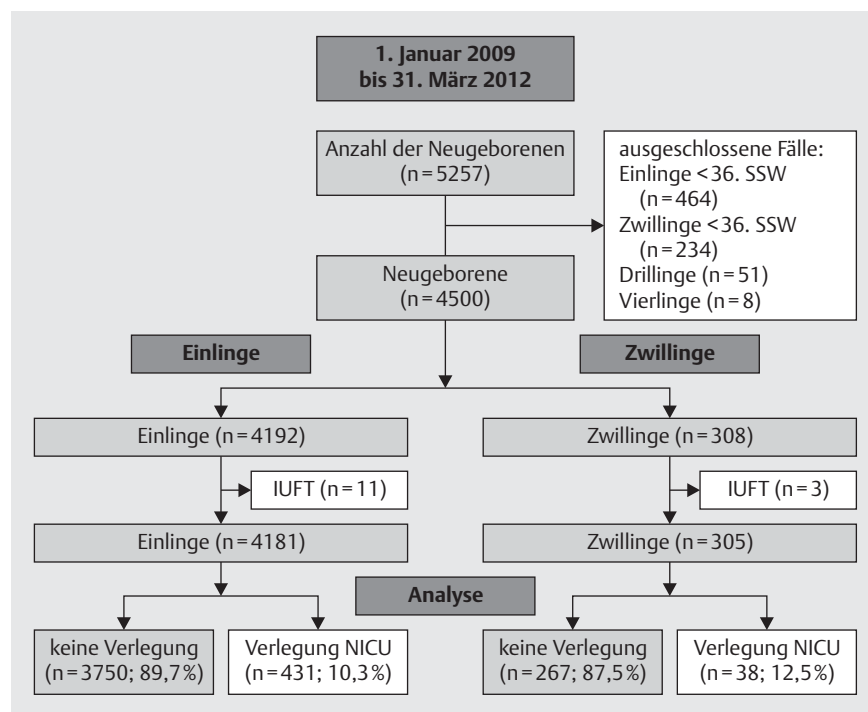

Abb. 1 Erhebung der Studienpopulation.

- ▶ anamnestische Hinweise für eine neonatale Infektion (mütterliches Fieber ( $> 38,5^{\circ}\text{C}$ , mütterliche Leukozytose, mütterliche CRP-Konzentration  $> 4\text{ mg/dL}$ , vorzeitiger Blasensprung ( $> 24$  Stunden), pränataler vaginaler Abstrich (z. B. B-Streptokokken im Anogenitalbereich), peripartale antibiotische Therapie der Mutter, grünes Fruchtwasser)
- ▶ dystrophe Neugeborene
- ▶ Geburtsgewicht  $< 3er$ -Perzentile
- ▶ kindliche Hypoglykämie (Lebensstunde 1–24 Blutzucker-(BZ-)Stix  $< 35\text{ mg/dL}$ ; Lebensstunde  $> 24$  BZ-Stix  $< 45\text{ mg/dL}$ )
- ▶ Geburtsgewicht  $> 4000\text{ g}$  (3 Tage lang täglich 2-mal Nüchternblutzucker)
- ▶ mütterliche HIV-Infektion
- ▶ Herzrhythmusstörungen
- ▶ Entzugssymptome beim Neugeborenen/bekannte mütterliche pharmakologische Anamnese
- ▶ perinatale Asphyxie (keine allgemeinverbindliche Definition; Hinweise sind: Nabelarterien-pH von  $< 7,10$ , Apgar-Werte (leichte Asphyxie = 1-Minuten-Wert 4–7; schwere Asphyxie = 1-Minuten-Wert 0–3), mehrminütige Beatmung oder Intubation bei fehlender Eigenatmung)
- ▶ angeborene Fehlbildungen
- ▶ bekannte Stoffwechselstörung/Gerinnungsstörung der Mutter

Die folgenden möglichen Einflussfaktoren bzw. Prädiktorfaktoren für eine Verlegung auf die neonatologische Intensivstation der Johann Wolfgang Goethe-Universität Frankfurt wurden evaluiert: Geburtsdauer, BMI, Alter der Mutter, Gestationsdiabetes, Geburtsmodus, Nabelschnur-pH, Apgar, Geschlecht, Gewicht und Länge des Neugeborenen, Terminüberschreitung, Nabelschnurumschlingungen, protrahierte Geburt (fehlender Geburtsfortschritt über 2 Stunden), BEL, Zustand nach Sectio, Fieber der Mutter unter der Geburt, pathologisches CTG und grünes Fruchtwasser. Die Daten wurden retrospektiv von der Perinatalerhebung in das Programm SPSS (Statistical Package for the Social Sciences Version 17.0, IBM, Ehningen) importiert. Mit SPSS erfolgte die Berechnung der Durchschnittswerte, Standardabweichungen, Spearman's Rho-Koeffizienten, der Fisher-Exact-Tests und der Mann-Whitney-U-Tests und die binäre logistische Regressionsanalyse. In der Regressionsanalyse wurde die Voraussage einer Verlegung des Neugeborenen mit den Faktoren der Schwangerschaftswoche und Entbindungsart berechnet.

**Tab. 1** Indikation zur Verlegung des Neugeborenen: Vergleich der Einlingsgeburten mit Zwillingsgeburten (Fisher-Exact-Test).

|                                                          | Einlinge     | Gemini      | p-Wert    |
|----------------------------------------------------------|--------------|-------------|-----------|
| HIV                                                      | 31 (0,8%)    | 0 (0%)      | n. s.     |
| Gewicht unter 2500 g                                     | 33 (0,9%)    | 25 (8,2%)   | $< 0,001$ |
| Störung der Atmung                                       | 75 (2,0%)    | 5 (1,6%)    | n. s.     |
| sonstige Infektion (spezifisch für die Perinatalperiode) | 116 (3,1%)   | 4 (1,3%)    | n. s.     |
| Herzrhythmusstörung                                      | 19 (0,5%)    | 2 (0,7%)    | n. s.     |
| Neugeborenenikterus                                      | 35 (0,9%)    | 0 (0%)      | n. s.     |
| Entzugssymptome beim Neugeborenen                        | 20 (0,5%)    | 0 (0%)      | n. s.     |
| schwere Asphyxie unter der Geburt                        | 5 (0,1%)     | 0 (0%)      | n. s.     |
| Stoffwechselstörung/Gerinnungsstörung                    | 18 (0,5%)    | 0 (0%)      | n. s.     |
| angeborene Fehlbildungen                                 | 61 (1,6%)    | 2 (0,7%)    | n. s.     |
| andere Gründe                                            | 7 (0,2%)     | 0 (0%)      | n. s.     |
| Gesamtanzahl der Verlegungen                             | 423 (10,1%)  | 38 (12,5%)  | n. s.     |
| Gesamtanzahl ohne Verlegung                              | 3750 (89,9%) | 267 (87,5%) | –         |

## Ergebnisse

### ▼ Insgesamt ähnliche Verlegungs-raten bei reifen Einlings- und Zwillingschwangerschaften

Insgesamt zeigten sich ähnliche Verlegungs-raten bei reifen Einlings- und Zwillingschwangerschaften (10,1 vs. 12,5%;  $p > 0,05$ ; **Tab. 1**). Nur der Einflussfaktor „Geburtsgewicht 1500–2500 g“ war statistisch signifikant häufiger bei Zwillingschwangerschaften. Bei Einlingen war die Infektion, die spezifisch für die Perinatalperiode war, mit 3,0% der häufigste Verlegungsgrund auf die neonatologische Intensivstation, während die Anpassungsstörungen in 1,9% auftraten (**Tab. 1**).

### Verlegungsrate der Neugeborenen abhängig vom Entbindungsmodus

**Abb. 2** zeigt die Entbindungsmodi bei Einlings- und Zwillingschwangerschaften unseres Studienkollektivs. Die Schwangeren ohne Risikofaktoren hatten die niedrigste neonatale Verlegungsrate mit 4,7% nach einer vaginalen Entbindung, während die Risikoschwangeren eine fast doppelt so hohe neonatale Verlegungsrate von 8,3% ( $p < 0,001$ ) aufwiesen (**Tab. 2**). Im Vergleich wies die spontane vaginale Beckenendlagen-Entbindung eine nicht statistisch signifikante, minimal erhöhte neonatale Verlegungsrate von 6,2% ( $p > 0,05$ ) auf. Eine Forzeps-Entbindung

**Tab. 2** Verlegungsrate der Neugeborenen abhängig vom Entbindungsmodus bei Einlingschwangerschaften (Vergleich von Geburt nach normaler SS [keine Risiko-SS] mit Risiko-SS, Forzeps-Entbindungen, Geburt aus BEL und Sectio); SS = Schwangerschaft (Fisher-Exact-Test).

|             | vaginale Entbindung |            | Forzeps   | BEL       | Sectio                      |                            |             |
|-------------|---------------------|------------|-----------|-----------|-----------------------------|----------------------------|-------------|
|             | Spontanpartus       |            |           |           | primär (ohne Fehlbildungen) | primär (mit Fehlbildungen) | sekundär    |
|             | keine Risiko-SS     | Risiko-SS  |           |           |                             |                            |             |
| Verlegungen | 45 (4,7%)           | 106 (8,3%) | 48 (9,3%) | 13 (6,2%) | 32 (10,0%)                  | 93 (24,3%)                 | 110 (14,0%) |
| gesamt      | 961                 | 1276       | 515       | 209       | 321                         | 382                        | 784         |
| p-Wert      | –                   | $< 0,001$  | $< 0,001$ | n. s.     | $< 0,001$                   | $< 0,001$                  | $< 0,001$   |

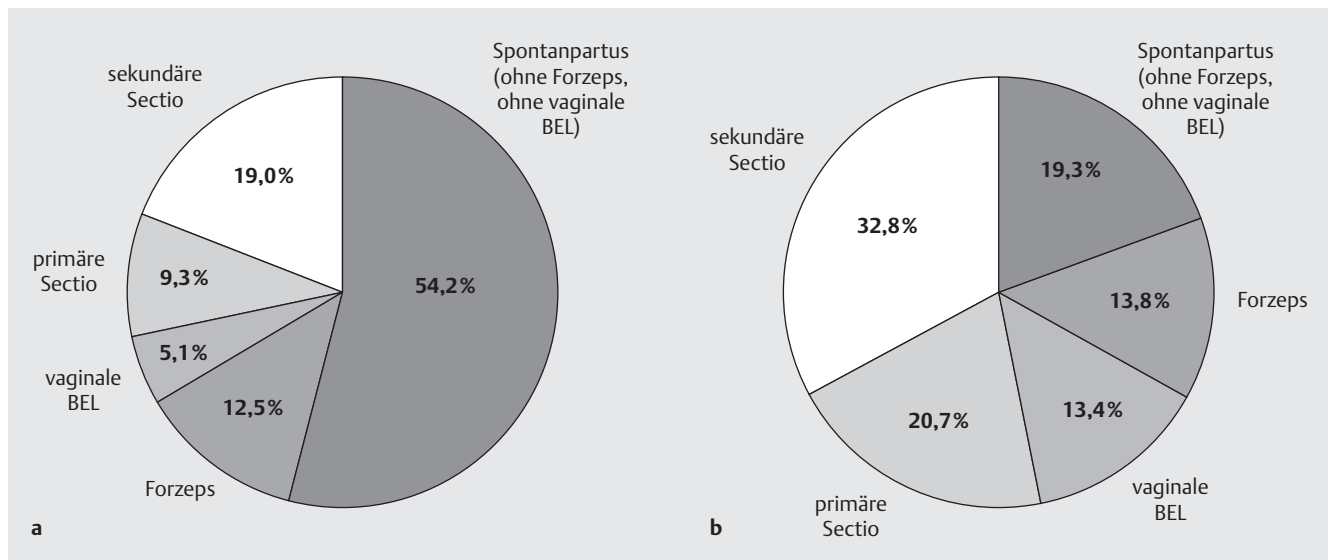

**Abb. 2a und b** Entbindungsmodus von **a** Einlingsschwangerschaften (n = 4181) und **b** Zwillingsschwangerschaften (n = 305) in der  $\geq 36 + 0$  SSW.

und eine primäre und sekundäre Sectio zeigten statistisch signifikant höhere neonatale Verlegungsrate von jeweils 9,3, 10,0 (ohne Fehlbildungen) und 14,0% ( $p < 0,001$ ).

Bei den Risikoschwangerschaften zeigte sich nur bei den primären und sekundären Sectiones eine statistisch signifikant höhere neonatale Verlegungsrate ( $p < 0,001$ ) (● **Tab. 2**).

Bei den Zwillingsschwangerschaften wurden ähnliche neonatale Verlegungsrate wie bei Einlingsschwangerschaften detektiert, wobei ein statistisch signifikanter Unterschied nicht belegt werden konnte.

#### Rate der Verlegungen der Neugeborenen abhängig vom Schwangerschaftsalter

● **Tab. 3** und **Abb. 3a** beschreiben die neonatale Verlegungsrate abhängig vom Schwangerschaftsalter. Es zeigte sich eine signifikante Korrelation der Schwangerschaftswoche mit der Verlegung auf die neonatologische Intensivstation ( $Rho\ 0,11$ ;  $p < 0,001$ ).

Außerdem zeigte sich eine weitere Korrelation mit dem Entbindungsmodus (0,12;  $p < 0,001$ ), 5-Minuten-Apgar (0,24;  $p < 0,001$ ), 10-Minuten-Apgar (0,34;  $p < 0,001$ ), Geburtsgewicht (0,12;  $p < 0,001$ ), Neugeborenenlänge (0,09;  $p < 0,001$ ), Geschlecht des Neugeborenen (0,03;  $p = 0,04$ ) und dem arteriellen Geburts-pH-Wert (0,03;  $p = 0,03$ ). Keine statistisch signifikante Korrelation zeigte sich bei der Geburtsdauer, Base Excess (BE), mütterlichem BMI und Gestationsdiabetes ( $p > 0,05$ ).

In der logistischen Regressionsanalyse der Einlingsschwangerschaften zeigte sich eine statistische Signifikanz für den Einfluss der Schwangerschaftswoche (Odds Ratio = 0,8; 95%-KI 0,7–0,8;  $p < 0,001$ ). Die vaginale Entbindung zeigte eine signifikante negative Voraussage einer Verlegung auf die neonatologische Intensivstation (Odds Ratio = 0,5; 95%-KI 0,4–0,8;  $p = 0,001$ ), wohingegen die primäre Sectio eine signifikante Vorhersage zugunsten einer Verlegung aufzeigte (Odds Ratio = 1,1; 95%-KI 1,0–1,2;  $p = 0,009$ ). Forzeps-Entbindungen und sekundäre Sectiones hat-

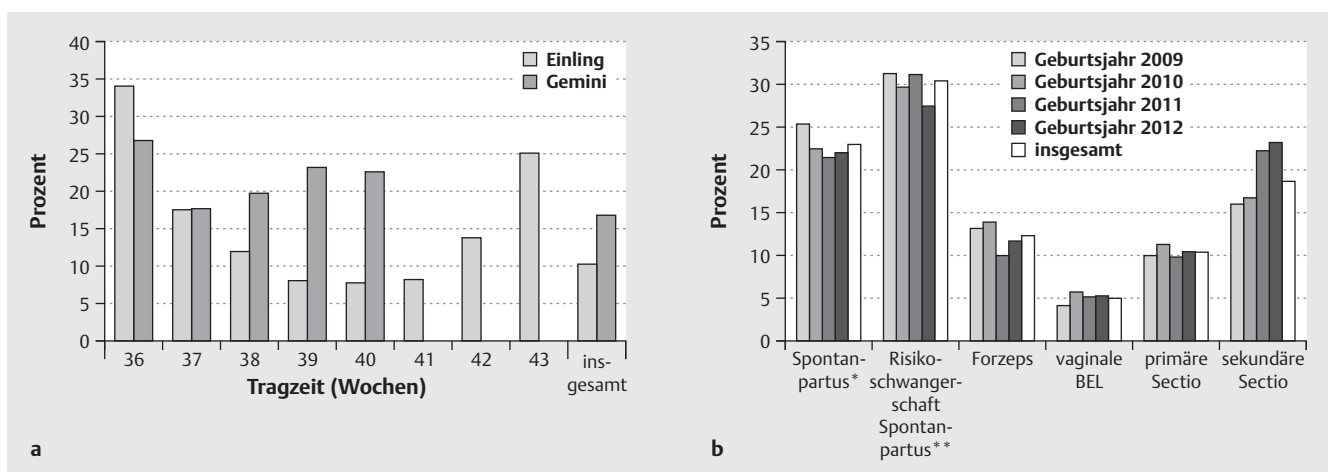

**Abb. 3a und b** a Verlegungsrate von Einlingsschwangerschaften (n = 4181) und Zwillingsschwangerschaften in der  $\geq 36 + 0$  SSW abhängig vom Schwangerschaftsalter. **b** Entbindungsmodus von Einlingsschwangerschaften (2009 n = 1255; 2010 n = 1305; 2011 n = 1292; 2012 [1. Quartal] n = 327) abhängig vom Entbindungsjahr in der  $\geq 36 + 0$  SSW; \* ohne Forzeps, vaginale BEL und Risikoschwangerschaften; \*\* ohne Forzeps, vaginale BEL und Nichttrisikoschwangerschaften.

**Tab. 3** Rate der Verlegungen der Neugeborenen abhängig vom Schwangerschaftsalter.

|             |                    | Tragzeit Wochen |      |      |       |       |     |      |    | total |
|-------------|--------------------|-----------------|------|------|-------|-------|-----|------|----|-------|
|             |                    | 36              | 37   | 38   | 39    | 40    | 41  | 42   | 43 |       |
| Einling     | Verlegung NICU (%) | 34              | 17,5 | 12   | 8,1   | 7,7   | 8,2 | 13,8 | 25 | 10,3  |
|             | total (n)          | 147             | 314  | 643  | 1 127 | 1 257 | 624 | 65   | 4  | 4 181 |
| Gemini      | Verlegung NICU (%) | 28,2            | 2,5  | 7,1  | 5,6   | 7,1   |     |      |    | 11,1  |
|             | total (n)          | 39              | 40   | 42   | 18    | 14    |     |      |    | 153   |
| Gemini (2.) | Verlegung NICU (%) | 25,6            | 7,5  | 11,9 | 11,8  | 7,1   |     |      |    | 13,8  |
|             | total (n)          | 39              | 40   | 42   | 17    | 14    |     |      |    | 152   |

NICU = neonatologische Intensivstation (neonatology intensive care unit)

ten keine signifikante Vorhersage einer neonatalen Verlegung ( $p > 0,05$ ). Bei den Zwillingschwangerschaften konnte in der logistischen Regressionanalyse kein statistisch signifikantes Ergebnis beschrieben werden.

### Entbindungsmodus abhängig vom Entbindungsjahr

● **Abb. 3b** zeigt den Geburtsmodus abhängig vom Geburtenjahr. Wenn man das Geburtenjahr 2009 mit 2011 vergleicht, zeigt sich ein hoch signifikanter Anstieg an sekundären Kaiserschnitten ( $p < 0,001$ ), sowie ein Rückgang der nicht instrumentellen vaginalen Geburten ( $p = 0,04$ ) und der Forzepsentbindungen ( $p = 0,02$ ). Bei den elektiven Kaiserschnitten und der Rate der vaginalen Beckenendlagenentbindung konnte keine Veränderung detektiert werden ( $p > 0,05$ ).

### Diskussion

▼  
In unserer Studie zeigte sich bei Vaginalgeburten von Schwangeren ohne Risikofaktoren eine fast 2-fach niedrigere neonatale Verlegungsrate im Vergleich zu Risikoschwangeren. Unsere Ergebnisse bestätigen andere Studienergebnisse [15, 19–22], die zeigen konnten, dass eine geplante Sectio unter anderem im Vergleich mit einer vaginalen Geburt oder einem Versuch der vaginalen Entbindung ein erhöhtes Risiko neonataler Beatmungsschwierigkeiten aufweist. Wenn man andere Einflussfaktoren, wie z. B. Fehlbildungen [20, 21, 23] und Risikoschwangerschaften [13, 23] ausschließt, zeigt sich ein 2- bis 3-mal höheres Risiko für neonatale Beatmungsschwierigkeiten bei einer geplanten Sectio im Vergleich zu einer vaginalen Geburt [21]. In einigen Studien wurde eine noch höhere Häufigkeit von Beatmungsproblemen des Neugeborenen beim Kaiserschnitt beschrieben [13, 23].

Auch unsere Ergebnisse bestätigen, dass das Schwangerschaftsalter einen großen Einfluss auf die Anpassungsstörungen bzw. die Verlegungsrate des Neugeborenen hat [5, 12–14, 20–23]. Eine geplante Sectio sollte daher so nah wie möglich an den Geburtstermin gelegt werden. Einige Studien zeigen, dass wenn eine Sectio vor spontanem Geburtsbeginn durchgeführt wird, häufiger Atmungsprobleme des Neugeborenen auftreten [5, 14]. Obwohl Verbesserungen in der Sicherheit der Anästhesie und Chirurgie zu verzeichnen sind, ist die mütterliche und neonatale Morbidität und Mortalität höher im Vergleich mit der vaginalen Geburt [24]. Inzwischen hat sich das Sterblichkeitsrisiko der Vaginalgeburt vs. Sectio vermindert auf 1:2,6 (Sectio-Letalität 1:57300) [25, 26], daher verliert das Argument der höheren Müttersterblichkeit immer mehr an Bedeutung. Es bleiben jedoch sectiospezifische Morbiditätsrisiken (z. B. Sekundärheilung) und bei einer weiteren Schwangerschaft eine erhöhte Wahr-

scheinlichkeit für eine erneute Sectio, eine Plazentationsstörung oder eine Uterusruptur [26–28]. Obwohl es einige Studien zu den Komplikationen der vaginalen Geburt, insbesondere der Harninkontinenz und Stuhlinkontinenz, gibt [29, 30], sind diese jedoch nicht ausreichend, um eine Sectio-Indikation zu rechtfertigen [31].

In unserem Kollektiv spiegelte sich nicht die ansteigende Zahl der primären Sectiones in den letzten Jahren wider, sondern ein Rückgang der vaginal-operativen Geburten hin zu einer sekundären Sectio. Ob dies ein objektiver Trend oder eine subjektive Entscheidung des/der Geburtshelfer/in und der Mutter/Eltern darstellt, die sich durch forensische Aspekte und die Angst vor kindlichen Komplikationen bei einer Forzepsentbindung erklärt, muss in weiteren Studien geklärt werden [28, 32, 33].

### Fazit für die Praxis

▼  
So lange es keine Kontraindikation(en) für eine normale vaginale Geburt für das reife Kind gibt, scheint die vaginale Geburt mit einem niedrigeren Risiko einer Verlegung des Neugeborenen auf die neonatologische Intensivstation vergesellschaftet zu sein als die elektive Sectio. Wenn doch eine elektive Sectio notwendig ist, sollte die Operation so nahe wie möglich an dem Geburtstermin geplant werden.

### Ethikvotum

▼  
Dies ist eine retrospektive Analyse klinischer Daten, ohne Änderung des Managements der Patientinnen.

### Autoren-Beitrag

▼  
Der erste Autor hat die Studie entworfen, die Daten analysiert und den ersten Manuskriptentwurf geschrieben. Alle Autoren haben die Ergebnisse und das Manuskript evaluiert.

### Interessenkonflikt

▼  
Keine.

### Literatur

- 1 Grisar S, Samueloff A. Primary nonmedically indicated cesarean section ("section on request"): Evidence based or modern vogue? Clin Perinatol 2004; 31: 409–430
- 2 Wax JR, Cartin A, Pinette MG et al. Patient choice cesarean: an evidence-based review. Obstet Gynecol Surv 2004; 59: 601–616

- 3 Smith GC, Pell JP, Dobbie R. Caesarean section and risk of unexplained stillbirth in subsequent pregnancy. *Lancet* 2003; 362: 1179–1184
- 4 Hannah ME, Hannah WJ, Hewson SA et al.; The Term Breech Trial Collaborative group. Planned caesarean section versus planned vaginal birth for breech presentation at term: a randomised multicentre trial. *Lancet* 2000; 356: 1375–1383
- 5 Morrison JJ, Rennie JM, Milton PJ. Neonatal respiratory morbidity and mode of delivery at term: influence of timing of elective caesarean section. *BJOG* 1995; 102: 101–110
- 6 Häger R, Daltveit AK, Hofoss D et al. Complications in caesarean deliveries: rates and risk factors. *Am J Obstet Gynecol* 2004; 190: 428–434
- 7 Ecker JL. Once a pregnancy, always a cesarean? Rationale and feasibility of a randomized controlled trial. *Am J Obstet Gynecol* 2004; 190: 314–318
- 8 Schindl M, Birner P, Reingrabner M et al. Elective cesarean section vs. spontaneous delivery: a comparative study of birth experience. *Acta Obstet Gynecol Scand* 2003; 82: 834–840
- 9 Heit M, Mudd K, Culligan P. Prevention of childbirth injuries to the pelvic floor. *Curr Womens Health Rep* 2001; 1: 72–80
- 10 Harper MA, Byington RP, Espeland MA et al. Pregnancy-related death and health care services. *Obstet Gynecol* 2003; 102: 273–278
- 11 Bergholt T, Stenderup JK, Vedsted-Jakobsen A et al. Intraoperative surgical complications during cesarean section: an observational study of the incidence and risk factors. *Acta Obstet Gynecol Scand* 2003; 82: 251–256
- 12 Nicoll AE, Black C, Pows A et al. An audit of neonatal respiratory morbidity following elective caesarean section at term. *Scott Med J* 2004; 49: 22–25
- 13 Zanardo V, Simbi AK, Franzoi M et al. Neonatal respiratory morbidity risk and mode of delivery at term: influence of timing of elective caesarean delivery. *Acta Paediatr* 2004; 93: 643–647
- 14 Madar J, Richmond S, Hey E. Surfactant-deficient respiratory distress after elective delivery at “term”. *Acta Paediatr* 1999; 88: 1244–1248
- 15 Kolas T, Saugstad OD, Daltveit AK et al. Planned caesarean versus planned vaginal delivery at term: Comparison of newborn infant outcomes. *Am J Obstet Gynecol* 2006; 195: 1538–1543
- 16 Hübener C, Delius M, Deppe C et al. Entbindung versus Prolongation der Schwangerschaft – Bedeutung des Interleukin 6 im Fruchtwasser in der Entscheidungsfindung bei vorzeitiger Wehentätigkeit und V.a. Amnioninfektionssyndrom. *Geburtsh Frauenheilk* 2011; 71 – G\_3
- 17 Reif P, Haas J, Schöll W et al. Reduktion der operativen Entbindungsrate durch den Einsatz von Mikrobiuntersuchungen bei auffälligem CTG unter Berücksichtigung des Gestationsalters. *Geburtsh Frauenheilk* 2011; 71 – P104
- 18 [http://www.awmf.org/uploads/tx\\_szleitlinien/015-023\\_S1\\_Vaginal-operative\\_Entbindungen\\_12-2007\\_12-2012.pdf](http://www.awmf.org/uploads/tx_szleitlinien/015-023_S1_Vaginal-operative_Entbindungen_12-2007_12-2012.pdf); Stand: Feb. 2013
- 19 Zanardo V, Simbi AK, Franzoi M et al. Neonatal respiratory morbidity risk and mode of delivery at term: influence of timing of elective caesarean delivery. *Acta Paediatr* 2004; 93: 643–647
- 20 Hansen AK, Wisborg K, Uldbjerg N et al. Elective caesarean section and respiratory morbidity in the term and near-term neonate. *Acta Obstet Gynecol* 2007; 86: 389–394
- 21 van den Berg A, van Elburg RM, van Geijn HP et al. Neonatal respiratory morbidity following elective caesarean section in term infants – A 5-year retrospective study and a review of the literature. *Eur J Obstet Gynecol Reprod Biol* 2001; 98: 9–13
- 22 Hales KA, Morgan MA, Thurnau GR. Influence of labor and route of delivery on the frequency of respiratory morbidity in term neonates. *Int J Gynecol Obstet* 1993; 43: 35–40
- 23 Levin EM, Ghai V, Barton JJ et al. Mode of delivery and risk of respiratory diseases in newborns. *Obstet Gynecol* 2001; 97: 439–442
- 24 Devendra K, Arulkumaran S. Should doctors perform an elective caesarean section on request? *Ann Acad Med Singapore* 2004; 32: 577–581
- 25 Absolute und relative Indikationen zur Sectio caesarea. AWMF 015/054 (S1); 2008. <http://www.awmf.org/leitlinien/detail/II/015-054.html>; Stand: Feb. 2013
- 26 Welsch H, Wischnik A. Müttersterblichkeit. In: Schneider H, Husslein P, Schneider KTM, Hrsg. *Die Geburtshilfe*. 3. Auflage. Berlin: Springer Verlag; 2006: 1049–1063
- 27 Simoes E, Kunz SK, Münnich R et al. Informed consent for caesarean delivery: method-associated morbidity gradients require the participation of pregnant women. *Geburtsh Frauenheilk* 2010; 70: 732–738
- 28 Hübner M, Reisenauer C, Abele H. Welchen Stellenwert hat die primäre Sectio caesarea? *Geburtsh Frauenheilk* 2010; 70: 911–913
- 29 Gyhagen M, Bullarbo M, Nielsen TF et al. The prevalence of urinary incontinence 20 years after childbirth: a national cohort study in singleton primiparae after vaginal or caesarean delivery. *BJOG* 2012; DOI: 10.1111/j.1471-0528.2012.03301.x
- 30 Rath W, Vetter K. Der Kaiserschnitt zwischen Selbstbestimmungsrecht der Schwangeren, Mangel an gesichertem Wissen und ärztlicher Entscheidung. *Geburtsh Frauenheilk* 2002; 62: 838–842
- 31 Nelson RL, Fumer SE, Westercamp M et al. Caesarean delivery for the prevention of anal incontinence. *Cochrane Database Syst Rev* 2010; 2: CD006756
- 32 Reiter B, Windbichler G. Motive für den Wunsch nach einer electiven Sectio ohne medizinische Indikation. *Geburtsh Frauenheilk* 2010; 70: P28
- 33 Kunkel S, Schuler S, Bauer B et al. Gibt es Gründe für die steigende Sectiorate? Eine retrospektive Analyse der Sectiones 1995 und 2005 in der Missionsärztlichen Klinik in Würzburg. *Geburtsh Frauenheilk* 2012; 72: P33
